# Supplementary material for: The Role of +4U as an Extended Translation Termination Signal in Bacteria
Source: PubMed Central journal article supplement (PMC5289835; doi:10.1534/genetics.116.193961), 2016-11-29
Supplement: 539FileS1.pdf [file 539FileS1.pdf]

## **Description of supplemental files S2, S3, S4 and S5**

**S2.** Supplementary Table and figures discussed in the manuscript, with figure legends.

**S3.** RSCU data of 25 bacterial species were obtained in DAMBE: “Seq. Analysis| Codon Usage | Relative Synonymous Codon Usage” for 40 ribosomal protein genes with highest protein abundances and 40 genes with lowest non-zero protein abundances as reference HEGs and LEGs, respectively. All genes selected are non-pseudo, non-hypothetical. AA denotes amino acid coded, CF\_LEG denotes the total codon counts. H\_RSCU denotes the RSCU values in HEGs computed in DAMBE. The codons are separated as R-ending, Y-ending and others. The RSCU values are plotted for R-ending codons and others, not Y-ending codons (never show a slope of  $RSCU\_HEG > RSCU\_LEG$  due to the synonymous pair decoded by the same tRNA).

**S4.** ITE values for all non-pseudo, non-hypothetical coding DNA sequences in 19 bacterial species. ITE was computed for each species using their respective .ITE reference files compiled using CF\_HEG and CF\_LEG in supplemental file S3, in DAMBE: “Seq. Analysis| Codon Usage| Index of translation elongation (I\_TE)”. The method is “Break 8-fold and 6-fold families into 2”. Stop codons were obtained in DAMBE: “Sequence| Sequence Manipulation| Keep rightmost sites: 3”. The +4 base was obtained in DAMBE: “File| Open standard sequence file| Downstream of CDS: 1”.

**S5.** Data for figures 2 to 6 in the manuscript.
