# Supplementary material for: The Role of +4U as an Extended Translation Termination Signal in Bacteria
Source: PubMed Central journal article supplement (PMC5289835; doi:10.1534/genetics.116.193961), 2016-11-29
Supplement: 539FileS2.pdf [file 539FileS2.pdf]

Table S1. The usage of +4U in 100 non-pseudo, non-hypothetical HEGs and LEGs for each stop codon, ranked by CAI, in 25 bacterial species. Together with the number of 30S and 50S ribosomal protein genes in each species. The reference HEGs to compute CAI are the same 40 ribosomal protein genes used for .ITE reference files.

| SPECIES NAME                        | ACCESSION | N.R. <sup>a</sup> | UAA <sup>b</sup>   |                    | UAG                |                    | UGA                |                    |
|-------------------------------------|-----------|-------------------|--------------------|--------------------|--------------------|--------------------|--------------------|--------------------|
|                                     |           |                   | P <sub>U.HEG</sub> | P <sub>U.LEG</sub> | P <sub>U.HEG</sub> | P <sub>U.LEG</sub> | P <sub>U.HEG</sub> | P <sub>U.LEG</sub> |
| <i>Bacillus anthracis</i>           | NC_005945 | 56                | 0.77               | 0.23               | 0.37               | 0.29               | 0.32               | 0.24               |
| <i>Bacillus subtilis</i>            | NC_000964 | 56                | 0.65               | 0.24               | 0.19               | 0.10               | 0.44               | 0.34               |
| <i>Bartonella henselae</i>          | NC_005956 | 55                | 0.25               | 0.35               | 0.21               | 0.19               | 0.39               | 0.35               |
| <i>Staphylococcus aureus</i>        | NC_002758 | 53                | 0.78               | 0.35               | 0.34               | 0.32               | 0.49               | 0.343              |
| <i>Listeria monocytogenes</i>       | NC_003210 | 57                | 0.52               | 0.29               | 0.17               | 0.23               | 0.36               | 0.36               |
| <i>Streptococcus pyrogenes</i>      | NC_002737 | 51                | 0.61               | 0.23               | 0.34               | 0.24               | 0.51               | 0.49               |
| <i>Lactococcus lactis</i>           | NC_002662 | 57                | 0.64               | 0.17               | 0.36               | 0.34               | 0.32               | 0.32               |
| <i>Leptospira interrogans</i>       | NC_005823 | 54                | 0.37               | 0.26               | 0.30               | 0.34               | 0.41               | 0.33               |
| <i>Deinococcus deserti</i>          | NC_002937 | 51                | 0.17               | 0.14               | 0.12               | 0.11               | 0.12               | 0.17               |
| <i>Bacteriodes thetaiotaomicron</i> | NC_004663 | 55                | 0.62               | 0.29               | 0.34               | 0.21               | 0.46               | 0.28               |
| <i>Escherichia coli</i>             | NC_000913 | 57                | 0.62               | 0.3                | 0.36               | 0.24               | 0.72               | 0.30               |
| <i>Salmonella enterica</i>          | NC_003197 | 59                | 0.60               | 0.35               | 0.36               | 0.25               | 0.69               | 0.30               |
| <i>Yersinia pestis</i>              | NC_003143 | 56                | 0.63               | 0.39               | 0.33               | 0.31               | 0.65               | 0.45               |
| <i>Shewanella oneidensis</i>        | NC_004347 | 62                | 0.71               | 0.27               | 0.31               | 0.27               | 0.49               | 0.328              |

|                                       |             |    |      |      |      |      |      |      |
|---------------------------------------|-------------|----|------|------|------|------|------|------|
| <i>Neisseria meningitidis</i>         | NC_003112   | 57 | 0.52 | 0.21 | 0.33 | 0.32 | 0.59 | 0.27 |
| <i>Legionella pneumophila</i>         | NC_002942   | 54 | 0.37 | 0.39 | 0.29 | 0.29 | 0.42 | 0.26 |
| <i>Acidithiobacillus ferrooxidans</i> | NC_011761   | 56 | 0.15 | 0.30 | 0.15 | 0.20 | 0.24 | 0.31 |
| <i>Campylobacter jejuni</i>           | NC_002163   | 54 | 0.45 | 0.30 | 0.29 | 0.28 | 0.34 | 0.43 |
| <i>Desulfovibrio vulgaris</i>         | NC_002937   | 56 | 0.19 | 0.18 | 0.14 | 0.11 | 0.37 | 0.21 |
| <i>Mycobacterium tuberculosis</i>     | NC_000962   | 58 | 0.17 | 0.14 | 0.16 | 0.17 | 0.20 | 0.24 |
| <i>Microcystis aeruginosa</i>         | NC_010296.1 | 53 | 0.39 | 0.19 | 0.34 | 0.37 | 0.35 | 0.31 |
| <i>Helicobacter pylori</i>            | NC_000915   | 54 | 0.21 | 0.20 | 0.22 | 0.34 | 0.41 | 0.45 |
| <i>Pseudomonas aeruginosa</i>         | NC_002516   | 58 | 0.21 | 0.22 | 0.11 | 0.13 | 0.37 | 0.23 |
| <i>Shigella flexneri</i>              | NC_004337   | 53 | 0.62 | 0.17 | 0.47 | 0.20 | 0.63 | 0.37 |
| <i>Synechocystis sp.</i>              | NC_017277   | 52 | 0.32 | 0.26 | 0.35 | 0.18 | 0.38 | 0.33 |

---

a Number of 30S and 50S ribosomal protein genes.

b The +4U usage in 100 UAA-ending HEGs and LEGs (highest and lowest CAI scores, respectively).

## FIGURE LEGENDS

**Fig. S1.** Relationship between  $I_{TE}$  and usage of termination signals (stop codons and +4 bases), in *E. coli*. All non-pseudo, non-hypothetical CDSs were ranked by  $I_{TE}$  and binned into 10 sets. Twenty sequences in the 5' UTR were randomly shuffled using Sequence Manipulation Suite: Shuffle DNA (Stothard 2000). The stop codon usage and +4 base usage was obtained in each set. Stop codon usage ( $P_{UAA}$ ,  $P_{UAG}$ ,  $P_{UGA}$ ) is represented by solid lines; +4 base usage ( $P_A$ ,  $P_C$ ,  $P_G$ ,  $P_U$ ) is represented by dotted lines.

**Fig. S2.** Relationship between nc\_tRNA abundance and +4U usage, represented by linear regression between 100 UAA-ending HEGs (highest  $I_{TE}$  scores) and abundance of UAG nc\_tRNAs with a single mismatch at A) the first stop codon site, B) the second stop codon site, C) the third stop codon site, and abundance of UGA nc\_tRNAs with a single mismatch at D) the first stop codon site, E) the second stop codon site, F) the third stop codon site.

**Fig. S3.** The +4 base usage in all non-pseudo, non-hypothetical CDSs in 19 bacterial species (Table 1).

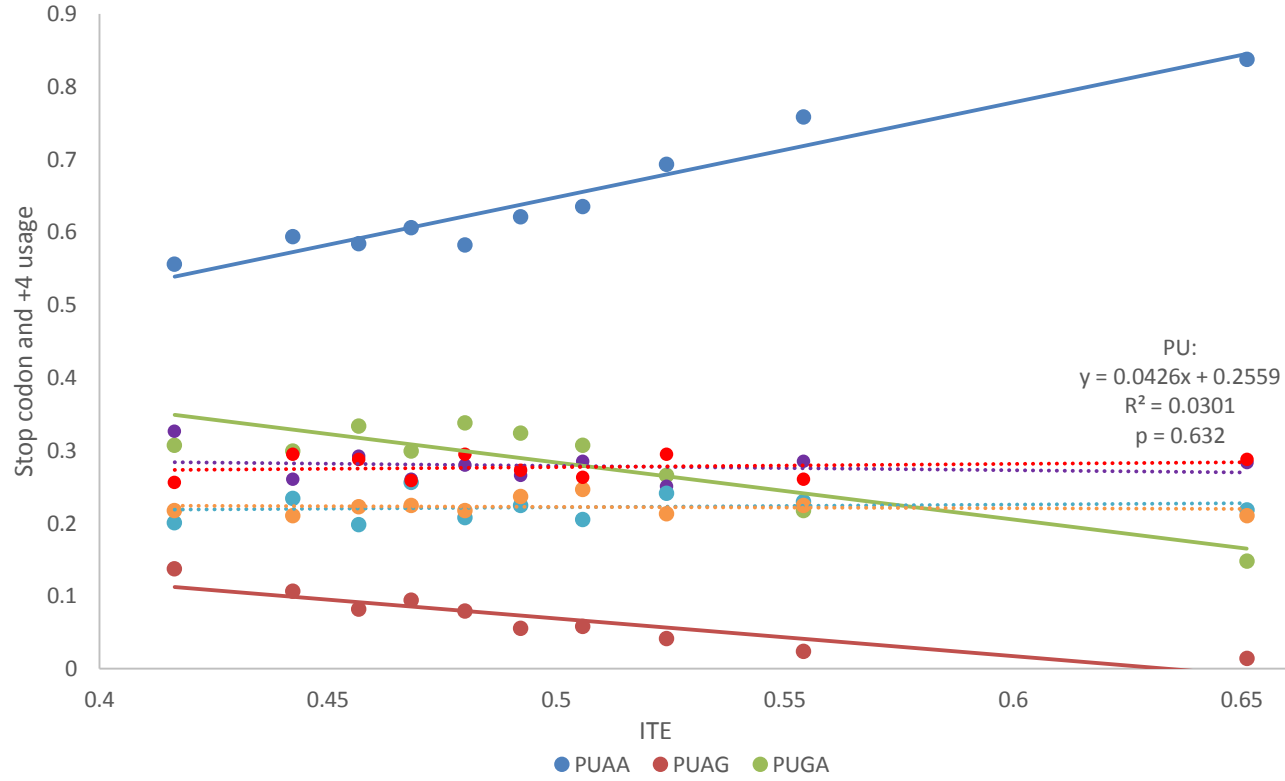

Fig. S1

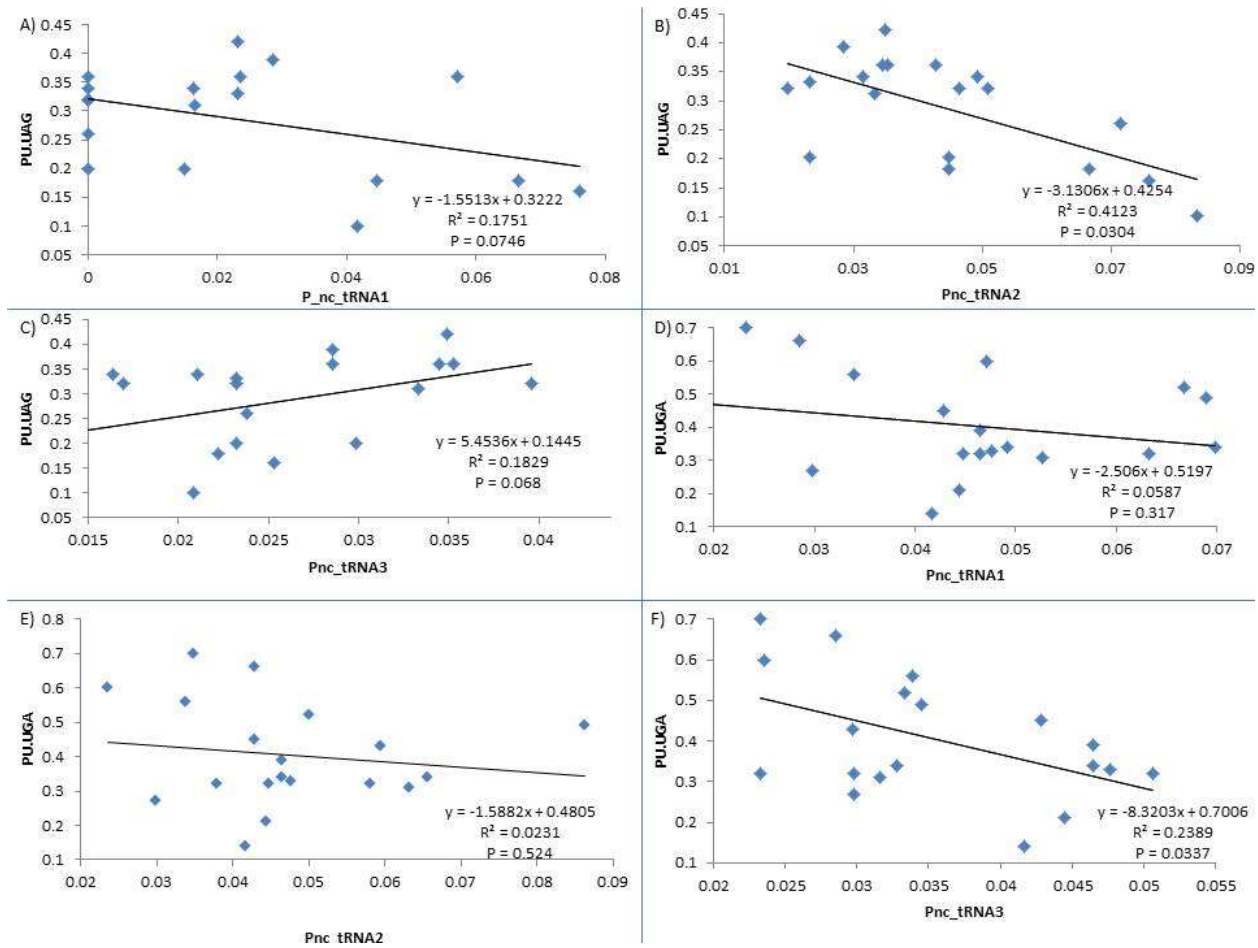

Fig. S2

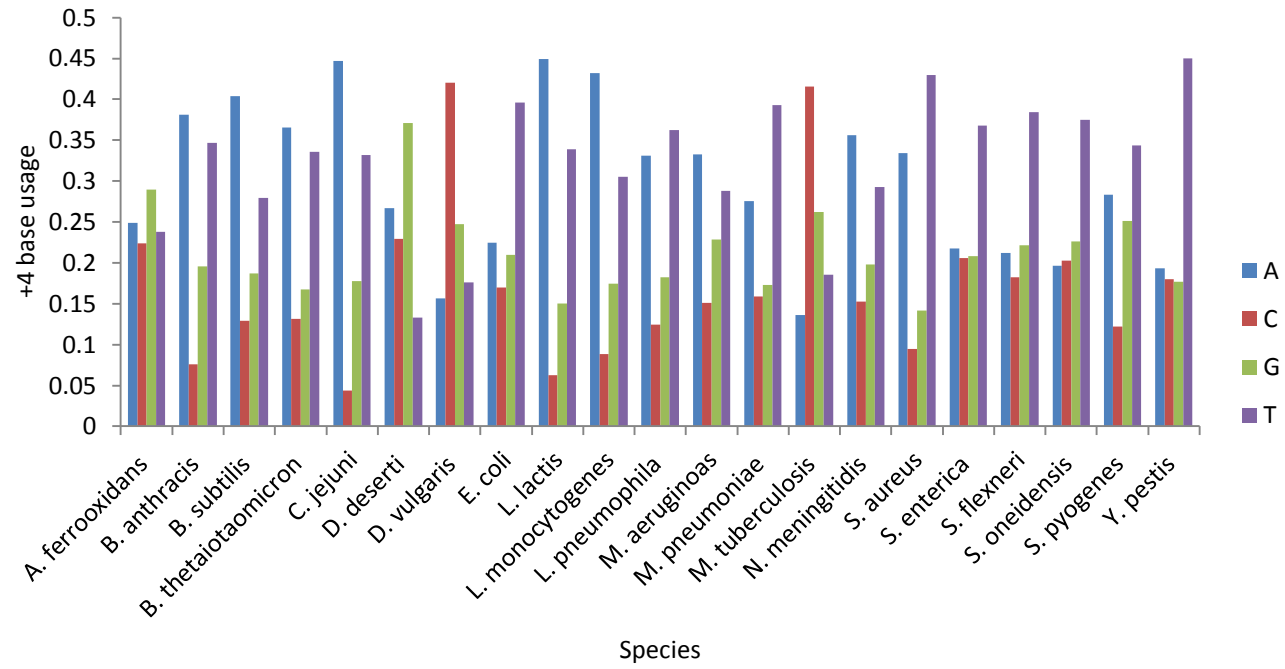

Fig. S3
